# Supplementary material for: Multilabel user classification using the community structure of online networks
Source: PubMed Central journal article supplement (PMC5344401; doi:10.1371/journal.pone.0173347), 2017-03-09
Supplement: pone.0173347.s002.pdf [file pone.0173347.s002.pdf]

**S2 Appendix. Lazy User-centric PageRank.** In order to elaborate on our first improvement, we consider the lazy Markov chain transition matrix  $W_\lambda = \lambda I + (1 - \lambda)D^{-1}A$ , where we call  $\lambda$  the *laziness factor*, i.e. the probability that the agent performs a self-loop at any step  $t$ . The motivation behind the addition of self-loops [1] with probability  $\lambda = 1/2$  was their leading to a faster distribution convergence and the reinforcement of vertices near the seed by slowing probability diffusion. This idea was adopted in the fast PageRank method by [2]. *We generalize the system by parameterizing by  $\lambda$  to show that this is an unnecessary and misleading artifact in the calculation of the user-centric PageRank vector.*

Due to  $\lambda$ , the single element PageRank and residual update rules are altered as in Eqs 12, 13. Laziness implies self-loops in  $W$  and hence probability equal to  $(1 - \rho)\lambda r^{(t)}(u)$  remains on  $r^{(t)}(u)$  after each iteration. If this probability is more than  $\varepsilon d(u)$ , an additional number of iterations on the same vertex are needed until  $r^{(u)}/d(u) < \varepsilon$ .

$$k_{\lambda pr}^{(t+1)} = k_{\lambda pr}^{(t)} + r^{(t)}I_u \tag{12}$$

$$r^{(t+1)} = r^{(t)} - \lambda r^{(t)}I_u + (1 - \lambda)(1 - \rho)W_u r^{(t)}, \tag{13}$$

At this point, we argue that these additional iterations can be omitted by considering the application of a very large number of updates on element  $u$  such that  $r(u) \rightarrow 0$ . The probability that would be pushed from  $r(u)$  to  $k_{\lambda pr}(u)$  equals to the limit of the geometric sequence in Eq 14. As we have mentioned before, we set the initial residual distribution to be equal to  $e_v$ , for uniformity. This is why we multiply the updates of Eqs 3 (in the main article) and 12 by a factor of  $\rho$ , which is also found in the calculation of the limit in Eq 14. Similarly, the probability from  $r(u)$  that is distributed to  $u$ 's neighbors is described in Eq 15.

$$\sum_{t=0}^{\infty} \rho r^{(t)}(u)(1 - \rho)^t \lambda^t = \frac{\rho r^{(t)}(u)}{1 - \lambda(1 - \rho)} = \rho_{eff} r^{(t)}(u) \tag{14}$$

$$\sum_{t=0}^{\infty} r^{(t)}(u)(1 - \lambda)(1 - \rho)^{t+1} \lambda^t = \frac{(1 - \lambda)(1 - \rho)r^{(t)}(u)}{1 - \lambda(1 - \rho)} = (1 - \rho_{eff})r^{(t)}(u), \tag{15}$$

One might have arrived at the same result by considering the steady-state solution  $k_{pr}^{(t+1)} = k_{pr}^{(t)} = k_{pr}^{(\infty)}$  of the PageRank definition, described in Eq 16.

$$k_{pr}^{(\infty)} = \rho e_v + (1 - \rho)k_{pr}^{(\infty)}W_\lambda \tag{16}$$

$$= \rho e_v + (1 - \rho)k_{pr}^{(\infty)}(\lambda I + (1 - \lambda)W) \tag{17}$$

$$= \frac{\rho}{1 - \lambda(1 - \rho)} e_v + \frac{(1 - \lambda)(1 - \rho)}{1 - \lambda(1 - \rho)} k_{pr}^{(\infty)}W \tag{18}$$

$$= \rho_{eff} e_v + (1 - \rho_{eff})k_{pr}^{(\infty)}W, \tag{19}$$

We have shown a statement, parameterized by  $\lambda$ , that clearly exposes the *distinction* between regular and lazy PageRank. Indeed, the introduction of laziness in approximate user-centric PageRank is *misleading*, as it implies a *different* PageRank vector with a  $\lambda$ -dependent effective restart probability  $\rho_{eff} = \frac{\rho}{1 - \lambda(1 - \rho)}$ .

Given that the laziness factor leads to a different PageRank result that is reachable through non-lazy approximate methods (that obviate unnecessary computational costs by exploiting the observations in Eqs 14 - 16), we opt to remove it from the approximate PageRank calculation. The computational gain is made by the fact that *only one iteration* is required on  $u$  for satisfying the threshold  $r^{(u)}/d(u) < \varepsilon$ .

## References

1. Spielman DA, Teng SH. A local clustering algorithm for massive graphs and its application to nearly-linear time graph partitioning. arXiv preprint arXiv:08093232. 2008;
2. Andersen R, Chung F, Lang K. Local graph partitioning using pagerank vectors. In: Foundations of Computer Science, 2006. FOCS'06. 47th Annual IEEE Symposium on. Berkeley, CA, USA: IEEE; 2006. p. 475–486.
