# Supplementary material for: Multilabel user classification using the community structure of online networks
Source: PubMed Central journal article supplement (PMC5344401; doi:10.1371/journal.pone.0173347), 2017-03-09
Supplement: pone.0173347.s004.pdf [file pone.0173347.s004.pdf]

**S1 Table. Notation Summary Tables.**

Summaries for the notation-heavy sections *Graph-based User Classification* and *Proposed Framework*, that contain the symbols necessary to comprehend the Algorithms 1-8 (in the main article), can be found in Tables 8 and 9.

**Table 8. Notation Summary - *Graph-based User Classification*.**

| Symbols             | Definitions                                                                                                                                     |
|---------------------|-------------------------------------------------------------------------------------------------------------------------------------------------|
| $G = (V, E)$        | graph (i.e. network of users)                                                                                                                   |
| $V$                 | set of vertices (i.e. users)                                                                                                                    |
| $E$                 | set of edges (i.e. social relations)                                                                                                            |
| $A$                 | graph's adjacency matrix                                                                                                                        |
| $a_{u,v} = A(u, v)$ | edge weight from user $u$ to $v \forall u, v \in E$                                                                                             |
| $A_{u:}, A_{:v}$    | single row or column of matrix $A$                                                                                                              |
| $N(v), d(v)$        | set of neighbor vertices and degree of vertex $v$                                                                                               |
| $L$                 | set of available labels that characterize users                                                                                                 |
| $V_l, V_u$          | labeled and unlabeled user sets                                                                                                                 |
| $y_v$               | labeling vector for user $v \in V_l, y_v(l) = \begin{cases} 1, & \text{if } v \text{ labeled as } l \in L \\ 0, & \text{otherwise} \end{cases}$ |
| $Y$                 | label matrix, where each row $Y_{v:} = y_v$                                                                                                     |
| $Y_l, Y_u$          | label matrices corresponding to sets $V_l$ and $V_u$                                                                                            |
| $X$                 | user coordinate (i.e. feature) matrix in latent space                                                                                           |
| $X_l, X_u$          | feature matrices corresponding to sets $V_l$ and $V_u$                                                                                          |
| $dim$               | latent space dimensionality                                                                                                                     |
| $h$                 | hypothesis that maps user projections $X_{v:}$ to label vectors $Y_{v:}$                                                                        |
| $C$                 | the full set of communities detected by a method                                                                                                |
| $ C $               | the number of communities                                                                                                                       |
| $c$                 | the set of vertices belonging to a community                                                                                                    |
| $ c $               | the number of vertices in a community                                                                                                           |
| $b_v = N(v) \cup v$ | the base vertex-centric community of vertex $v$                                                                                                 |
| $e_v$               | the extended vertex-centric community of vertex $v$                                                                                             |

Table 9. Notation Summary - *Proposed Framework*.

| Symbols          | Definitions                                                                |
|------------------|----------------------------------------------------------------------------|
| $k$              | sparse similarity vector (ARCTE definition)                                |
| $\text{nnz}(k)$  | the non-zero element indices of $k$                                        |
| $W$              | Markov chain transition probability matrix                                 |
| $k_{rw}$         | similarity vector based on random walk                                     |
| $\rho$           | restart probability                                                        |
| $\rho_{eff}$     | effective restart probability                                              |
| $k_{pr}$         | PageRank similarity vector (i.e. random walk with restart)                 |
| $\lambda$        | laziness factor - probability of agent not transitioning to another vertex |
| $k_{\lambda pr}$ | lazy PageRank similarity vector                                            |
| $ck_{\delta pr}$ | cumulative PageRank differences similarity vector                          |
| $r$              | residual probability distribution                                          |
| $\varepsilon$    | residual probability threshold                                             |
| $./$             | elementwise vector division operation                                      |
| $d_{ave}(v)$     | average degree of neighborhood $N(v)$                                      |
| $d_{max}(v)$     | maximum degree of neighborhood $N(v)$                                      |
| $d_{min}(v)$     | minimum degree of neighborhood $N(v)$                                      |
| $ivf(j)$         | inverse vertex frequency for community/dimension $j$ - unsupervised        |
| $M$              | contingency matrix                                                         |
| $PSNR(M)$        | function that calculates peak noise-to-signal ratio for all rows of M      |
| $\chi^2(j)$      | weight based on chi squared test for community/dimension $j$ - supervised  |
